# Supplementary material for: A co-design study to develop supportive interventions to improve psychological and social adaptation among adults with new-onset type 1 diabetes in Denmark and the UK
Source: HighWire-hosted journal article supplement (doi:10.1136/bmjopen-2021-051430), 2021-11-01
Supplement: bmjopen-2021-051430supp002_data_supplement.pdf [file bmjopen-2021-051430supp002_data_supplement.pdf]

TYPE 1 DIABETES CAN AFFECT MANY PARTS OF YOUR LIFE.  
THIS MIGHT INCLUDE YOUR:

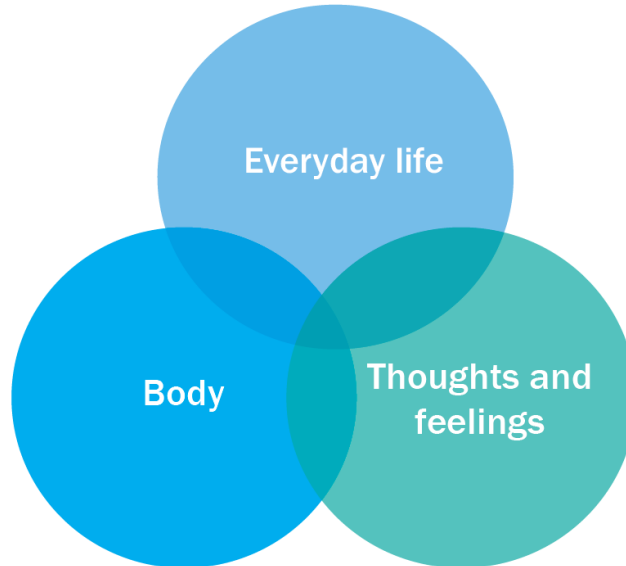

TYPE 1 DIABETES CAN AFFECT MANY PARTS OF YOUR LIFE.  
THIS MIGHT INCLUDE YOUR:

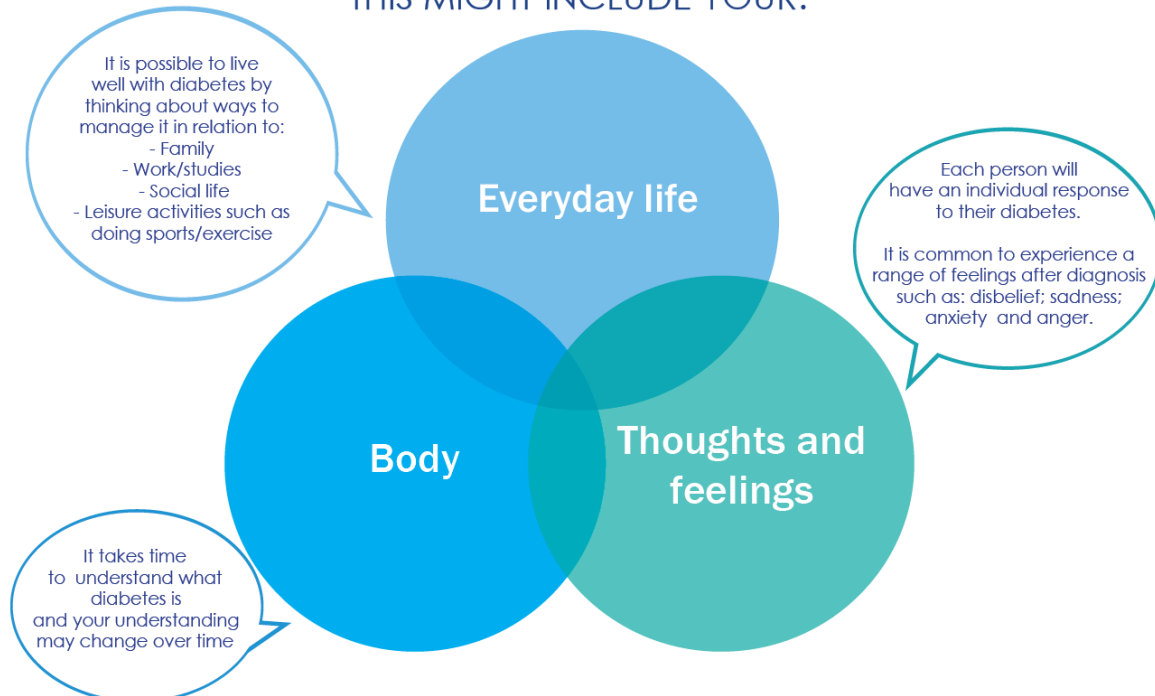

Please reference this paper
