# Supplementary material for: A co-design study to develop supportive interventions to improve psychological and social adaptation among adults with new-onset type 1 diabetes in Denmark and the UK
Source: HighWire-hosted journal article supplement (doi:10.1136/bmjopen-2021-051430), 2021-11-01
Supplement: bmjopen-2021-051430supp003_data_supplement.pdf [file bmjopen-2021-051430supp003_data_supplement.pdf]

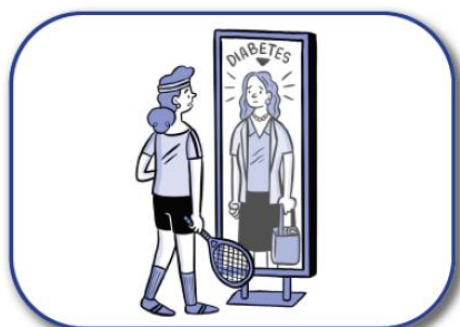

*"I feel stupid that this feels so hard because you almost feel like it feels a bit silly to say, 'This is really hard', because what is hard about it? It's difficult to explain what is hard."*

*(Julie, twenties)*

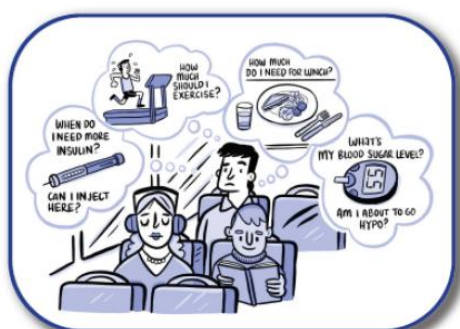

*"Sometimes it just feels really tedious. When you're tired and just want to have to not think about something, and you just still have to think about diabetes?"*

*(Eric, forties)*

Please reference this paper
